# Supplementary material
Source: PubMed Central journal article supplement (PMC5655080)
Supplement: AAC.01310-17_zac011176650s1.pdf [file AAC.01310-17_zac011176650s1.pdf]

## Supplemental material

N-acetylglucosamine-1-phosphate transferase WecA as a validated drug target in *M. tuberculosis* for development of new drugs against tuberculosis

Stanislav Huszár,<sup>a§</sup> Vinayak Singh,<sup>b§\*</sup> Alica Polčicová,<sup>a</sup> Peter Baráth,<sup>d</sup> María Belén Barrio,<sup>c</sup> Sophie Lagrange,<sup>c</sup> Véronique Leblanc,<sup>c</sup> Carol Nancy,<sup>e</sup> Valerie Mizrahi,<sup>b#</sup> Katarína Mikušová<sup>a#</sup>

Comenius University in Bratislava, Faculty of Natural Sciences, Department of Biochemistry, Bratislava, Slovakia<sup>a</sup>; MRC/NHLS/UCT Molecular Mycobacteriology Research Unit & DST/NRF Centre of Excellence for Biomedical TB Research, Institute of Infectious Disease and Molecular Medicine and Division of Medical Microbiology, Faculty of Health Sciences, University of Cape Town, Cape Town, South Africa<sup>b</sup>; Infectious Disease Therapeutic Strategic Unit, Sanofi R&D, Toulouse, France<sup>c</sup>; Institute of Chemistry, Slovak Academy of Sciences, Bratislava, Slovakia<sup>d</sup>; Sequella, Inc., Rockville, Maryland, USA<sup>e</sup>

### *Contents*

Supplemental Table S1  
Supplemental Materials and Methods  
Supplemental Figures S1-S8

**Table S1****Oligonucleotides used in this study**

| <b>Name</b>     | <b>Sequence (5'-3')<sup>a</sup></b> | <b>Application</b>                                                                                         | <b>Remark</b> |
|-----------------|-------------------------------------|------------------------------------------------------------------------------------------------------------|---------------|
| Rv1302c-Fwd     | GCACCACATATGCAGTACGGTCTCGAGGTG      | Forward primer used to amplify a 5'-fragment of the <i>wecA</i> gene cloned into pET28a and pET29a plasmid | This study    |
| Rv1302c-NRev    | GGGAAGCTTCTAGTCCAGGTCCGGGTCG        | Reversed primer used to amplify a 5'-fragment of the <i>wecA</i> gene cloned into pET28a plasmid           | This study    |
| Rv1302c-CRev    | GGGAAGCTTGTCCAGGTCCGGGTCGTAG        | Reversed primer used to amplify a 5'-fragment of the <i>wecA</i> gene cloned into pET29a plasmid           | This study    |
| Rv1302-pJAM-Fwd | AAGGGATCCGTGCAGTACGGTCTCGAGG        | Forward primer used to amplify a 5'-fragment of the <i>wecA</i> gene cloned into pJAM2 plasmid             | This study    |
| Rv1302-pJAM-Rev | GGCTCTAGAGTCCAGGTCCGGGTCGTAG        | Reversed primer used to amplify a 5'-fragment of the <i>wecA</i> gene cloned into pJAM2 plasmid            | This study    |
| Rv1302SUMOf     | ATGCAGTACGGTCTCGAG                  | Forward primer used to amplify a 5'-fragment of the <i>wecA</i> gene cloned into pETSUMO plasmid           | This study    |
| Rv1302SUMOr     | CTAGTCCAGGTCCGGGTC                  | Reversed primer used to amplify a 5'-fragment of the <i>wecA</i> gene cloned into pETSUMO plasmid          | This study    |
| MSM_4947-Fwd    | CCACCACATATGGACAGTCAGGTGGTCCTC      | Forward primer used to amplify a 5'-fragment of the <i>wecA</i> gene cloned into pET28a and pET29a plasmid | This study    |
| MSM_4947-NRev   | GGGAAGCTTTCACGGCTCCTGCGCACCG        | Reversed primer used to amplify a 5'-fragment of the <i>wecA</i> gene cloned into pET28a plasmid           | This study    |

|                     |                                |                                                                                                            |            |
|---------------------|--------------------------------|------------------------------------------------------------------------------------------------------------|------------|
| MSM_4947-CRev       | GGGAAGCTTCGGCTCCTGCGCACCGTGG   | Reversed primer used to amplify a 5'-fragment of the <i>wecA</i> gene cloned into pET29a plasmid           | This study |
| MSMEG_4947-pJAM-Fwd | AAAGGATCCATGGACAGTCAGGTGGTCCTC | Forward primer used to amplify a 5'-fragment of the <i>wecA</i> gene cloned into pJAM2 plasmid             | This study |
| MSMEG_4947-pJAM-Rev | GGGTCTAGACGGCTCCTGCGCACCGTC    | Reversed primer used to amplify a 5'-fragment of the <i>wecA</i> gene cloned into pJAM2 plasmid            | This study |
| MSMEG_4947SUMOf     | TTGCTGCAGTACGGTGCT             | Forward primer used to amplify a 5'-fragment of the <i>wecA</i> gene cloned into pETSUMO plasmid           | This study |
| MSMEG_4947SUMOr     | TCACGGCTCCTGCGCACC             | Reversed primer used to amplify a 5'-fragment of the <i>wecA</i> gene cloned into pETSUMO plasmid          | This study |
| WecA_Mth_SUMOFwd    | ATGCAGTACGGTTCAGCGGTG          | Forward primer used to amplify a 5'-fragment of the <i>wecA</i> gene cloned into pETSUMO plasmid           | This study |
| WecA_Mth_SUMORev    | CTACTTCGAGTCGTACATCTGC         | Reversed primer used to amplify a 5'-fragment of the <i>wecA</i> gene cloned into pETSUMO plasmid          | This study |
| pET28_9_WecAMth_F   | GGACATATGCAGTACGGTTCAGCGGTGG   | Forward primer used to amplify a 5'-fragment of the <i>wecA</i> gene cloned into pET28a and pET29a plasmid | This study |
| pET28_WecAMth_NR    | GGGAAGCTTCTACTTCGAGTCGTACATCTG | Reversed primer used to amplify a 5'-fragment of the <i>wecA</i> gene cloned into pET28a plasmid           | This study |
| pET29_WecAMth_CR    | GGGAAGCTTCTTCGAGTCGTACATCTGCTC | Reversed primer used to amplify a 5'-fragment of the <i>wecA</i> gene cloned into pET29a plasmid           | This study |

|                      |                                                     |                                                                                                  |               |
|----------------------|-----------------------------------------------------|--------------------------------------------------------------------------------------------------|---------------|
| wecA_ <i>Sph</i> I F | cgctgg <b>GCATGC</b> agtggttcagctctcaggt            | Forward primer used to amplify a 5'-fragment of the <i>wecA</i> gene                             | This study    |
| wecA_ <i>Not</i> I R | gtccaa <b>GCGGCCGCTCA</b> <u>cggtggaatagacgaacc</u> | Reverse primer used to amplify a 5'-fragment of the <i>wecA</i> gene                             | This study    |
| wecA SCO F           | ctagccgccgaacgtgca                                  | To confirm the SCO                                                                               | This study    |
| wecA SCO R           | tctagccgcaccgtacca                                  | To confirm the SCO                                                                               | This study    |
| wecARTF              | GGGCTTTCTGCCACACAACCT                               | Forward primer for ddPCR analysis of <i>wecA</i>                                                 | This study    |
| wecARTR              | CCGGAATCGCCCATGAA                                   | Reverse primer for ddPCR analysis of <i>wecA</i>                                                 | This study    |
| wecAprobe            | CACCGGGCCAAGAT                                      | TaqMan (FAM) probe for ddPCR of <i>wecA</i>                                                      | This study    |
| sigARTF              | cgagccgatctcgttgga                                  | Forward primer for ddPCR analysis of <i>sigA</i>                                                 | Suppl. Ref. 1 |
| sigARTR              | ttcgatgaaatcgccaagct                                | Reverse primer for ddPCR analysis of <i>sigA</i>                                                 | Suppl. Ref. 1 |
| sigAProbe (VIC)      | acgaggcgacagc                                       | TaqMan (VIC) probe for ddPCR of <i>sigA</i>                                                      | Suppl. Ref. 1 |
| pSE100 F             | TGAGCTCTACGCCATCCCG                                 | Primers to verify the cloned gene in pSE100 and to confirm homologous recombination of pWecA-SCO | Suppl. Ref. 1 |
| pSE100 R             | TCTCCGGCTTCACCGATCC                                 |                                                                                                  |               |

<sup>a</sup> Restriction sites are shown in bold; in-frame stop codon is underlined.

## **Supplemental Materials and Methods**

### **Purification of *E. coli* MurF protein**

*E. coli* strain T7 express (C2566) harboring recombinant plasmid pTYB21 *murF* (kind gift from D. Crick, Colorado State University) was grown at 37 °C in 1 liter of LB-ampicillin (100 µg/ml) medium until the OD<sub>600</sub> reached ~ 0.6. The cultures were cooled at 4 °C for 30 min, followed by further growth at 15 °C with 0.4 mM IPTG for 18 hours. The cells were harvested by centrifugation (4,500 × g, 10 min, 4 °C) and washed 2 times with 20 mM HEPES pH 8.5. 1.2 g (wet weight) of cells were suspended in 10 ml of Column buffer (20 mM HEPES pH 8.5, 500 mM NaCl) and disrupted by sonication (15-s pulses with 40-s cooling intervals, 10 cycles) at 4 °C. The lysate was centrifuged (15,000 × g, 20 min, 4 °C) and ½ of the supernatant was used for purification. *E. coli* MurF protein was then purified according to IMPACT Kit Manual (NEB) using chitin resin (NEB cat. # S6651S). The cleavage of the intein-tag was done by incubation with 50 mM dithiothreitol for 40 hours at 20 °C on the column (Poly-Prep® Chromatography Column, Bio-RAD). Purified MurF protein was then eluted from the column, concentrated to 3.5 mg/ml (Amicon® Ultra 0.5 ml Centrifugal Filter, 10 000 MWCO) and used in enzymatic synthesis of [<sup>14</sup>C]-labeled UDP-MurNAc-pentapeptide.

### **Enzymatic synthesis of [<sup>14</sup>C]-UDP-MurNAc-pentapeptide**

The reaction mixture contained 100 mM Tris-HCl, pH 7.5, 300 mM NaCl, 30 mM MgCl<sub>2</sub>, 10 mM ATP, 1 mM UDP-MurNAc-tripeptide (BacWAN facility, University of Warwick) and 16.5 µCi [1-<sup>14</sup>C] D-Ala-D-Ala (specific activity 55 mCi/mmol, ARC) in the final volume of 300 µl. The reaction was initiated by the addition of purified *E. coli* MurF protein (100 µg) and the mixture was incubated 2 hours at 37°C. The MurF protein was then separated from the reaction mixture by Amicon® Ultra 0.5 ml Centrifugal Filter (10,000 MWCO). The final product was analyzed by TLC on aluminium-coated silica 60 F<sub>254</sub> plate (Merck) developed in 2-propanol/conc. NH<sub>4</sub>OH/H<sub>2</sub>O (6:3:1), followed by autoradiography using Kodak Bio-Max MR films. Conversion of [1-<sup>14</sup>C] D-Ala-D-Ala to [<sup>14</sup>C]-UDP-MurNAc-pentapeptide reached about 93-97% and thus no further purification of the reaction product was performed.

## Supplemental Figures

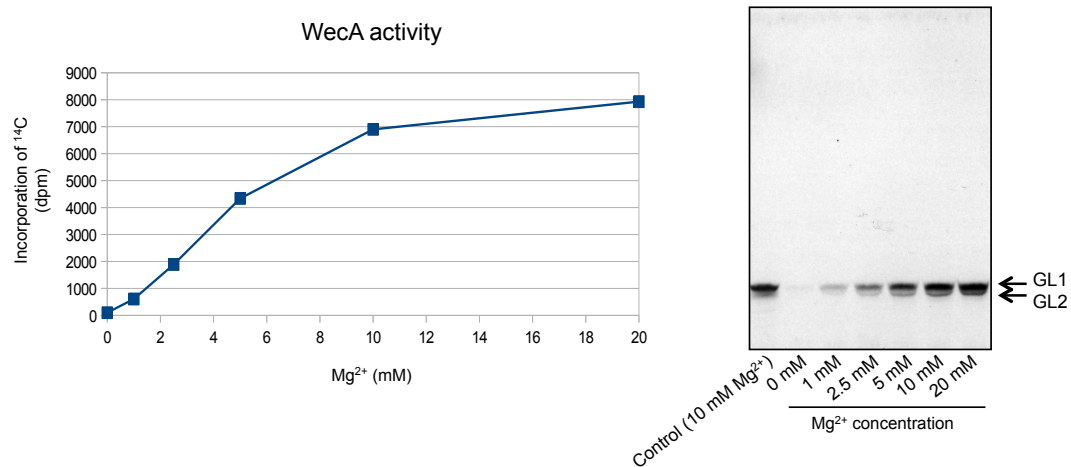

**Figure S1. Effect of Mg<sup>2+</sup> on activity of WecA from *M. smegmatis* mc<sup>2</sup>155.** Enzymatic reactions contain membrane fraction (300 µg protein) isolated from *M. smegmatis* mc<sup>2</sup>155, radiolabeled substrate UDP-[<sup>14</sup>C]GlcNAc (0.25 µCi) and different concentrations of MgCl<sub>2</sub>. The amount of radiolabeled product was quantified by scintillation spectrometry. 20% of the lipid extract was loaded on Silica-gel TLC plate, developed in CHCl<sub>3</sub>/CH<sub>3</sub>OH/NH<sub>4</sub>OH/H<sub>2</sub>O (65:25:0.5:3.6) and then exposed to autoradiography film for 3 days.

```

1 WecA M. smegmatis mc2155 1 10 20 30 40 50 60 70 80
2 WecA M. thermoresistibile MLQYGA P V I A T R E I T G M D S Q V V L A L S D T G A G V P I R E L A L V G L T A A I I T Y F A T G V R V L A I R F G A V A Y P R E R D V H V P T P R M G
3 WecA M. tuberculosis H37Ra MQYGL E V S R - - - D V A G V A G G I I A L S Y R G A G V P I R E L A L V G L T A A I I T Y F A T G V R V L A S R I G A V A Y P R E R D V H V P T P R M G
4 WecA M. tuberculosis H37Rv VQYGL E V S R - - - D V A G V A G G I I A L S Y R G A G V P I R E L A L V G L T A A I I T Y F A T G V R V L A S R I G A V A Y P R E R D V H V P T P R M G
100 110 120 130 140 150 160
1 WecA M. smegmatis mc2155 GL A M Y I G V A S A V I L A S Q L P A L T R G F V Y S T G M P A V V V A G G L I M A I G L I D D R W G L D A L T K F A G Q I T A A S V L V I M G V A W S V L Y I P
2 WecA M. thermoresistibile GL A M Y I G V A A A V I L A S Q L P A L T R G F V Y S T G M P A V V V A G G L I M A I G L I D D R W G L D A L T K F A G Q I T A A S V L V I M G V A W S V L Y I P
3 WecA M. tuberculosis H37Ra GL A M Y I G L I V G A V I L A S Q L P A L T R G F V Y S T G M P A V I V A G A V I M G I G L I D D R W G L D A L T K F A G Q I T A A S V L V I M G V A W S V L Y I P
4 WecA M. tuberculosis H37Rv GL A M Y I G L I V G A V I L A S Q L P A L T R G F V Y S T G M P A V I V A G A V I M G I G L I D D R W G L D A L T K F A G Q I T A A S V L V I M G V A W S V L Y I P
170 180 190 200 210 220 230 240
1 WecA M. smegmatis mc2155 I G G V G I I V L D Q V F S I L L T L A L T V S I I N A M N F V D G I D G L A A G I G L I T A I A I C V E S V G L I R D H G G D V I F Y P P A V I S V V L A G A C I
2 WecA M. thermoresistibile I G G V G I I V L D Q V F S I L L T L A L T V A V V N A M N F V D G I D G L A A G I G L I T A A I C I F S I G L I R D H G G D V I F Y P P A V I S V V L A G A C I
3 WecA M. tuberculosis H37Ra I G G V G I I V L D Q A F S I L L T L A L T V S I V N A M N F V D G I D G L A A G I G L I T A I A I C M F S V G L I R D H G G D V I F Y P P A V I S V V L A G A C I
4 WecA M. tuberculosis H37Rv I G G V G I I V L D Q A F S I L L T L A L T V S I V N A M N F V D G I D G L A A G I G L I T A I A I C M F S V G L I R D H G G D V I F Y P P A V I S V V L A G A C I
250 260 270 280 290 300 310 320
1 WecA M. smegmatis mc2155 G F I P H N F H R A K I F M G D S G S M I I G I M I A A A S T T A A G P I S Q N A Y G A R D V F A L I S P E L L V V A V M I V P A I D I I L A V R R T R A G R S P
2 WecA M. thermoresistibile G F I P H N F H R A K I F M G D S G S M I I G I M I A A A S T T A A G P I S Q S A Y G A R D V F A L I S P E L L V V A V M I V P A I D I I L A V R R T R A G R S P
3 WecA M. tuberculosis H37Ra G F I P H N F H R A K I F M G D S G S M I I G I M I A A A S T T A A G P I S Q N A Y G A R D V F A L I S P E L L V V A V M I V P A I D I I L A V R R T R A G R S A
4 WecA M. tuberculosis H37Rv G F I P H N F H R A K I F M G D S G S M I I G I M I A A A S T T A A G P I S Q N A Y G A R D V F A L I S P E L L V V A V M I V P A I D I I L A V R R T R A G R S A
330 340 350 360 370 380 390 400 410
1 WecA M. smegmatis mc2155 L S P D K M H L H R R L L G I G S H R R V V L L I Y L W G I L A F G A A S T F F D P K H G A V M L G A L V V A G V I L I P L I R R G F D I G A Q E P
2 WecA M. thermoresistibile F S D K M H L H R R L L G I G S H R R V V L L I Y L W G I L A F G A A S T F F D P K H G A V M L G A L V V A G V I L I P L I R R G F N D Y E Q M Y D S R
3 WecA M. tuberculosis H37Ra F S D K M H L H R R L L G I G S H R R V V L L I Y L W G I L A F G A A S T F F E N P R D T A A V M L G A L V V A G V I L I P L I R R G F D I Y D P D I D
4 WecA M. tuberculosis H37Rv F S D K M H L H R R L L G I G S H R R V V L L I Y L W G I L A F G A A S T F F E N P R D T A A V M L G A L V V A G V I L I P L I R R G F D I Y D P D I D

```

**Figure S2. Protein identity of mycobacterial WecA orthologs.** Protein identity was compared by Geneious software (Geneious version 7.1 created by Biomatters. Available from <http://www.geneious.com>)

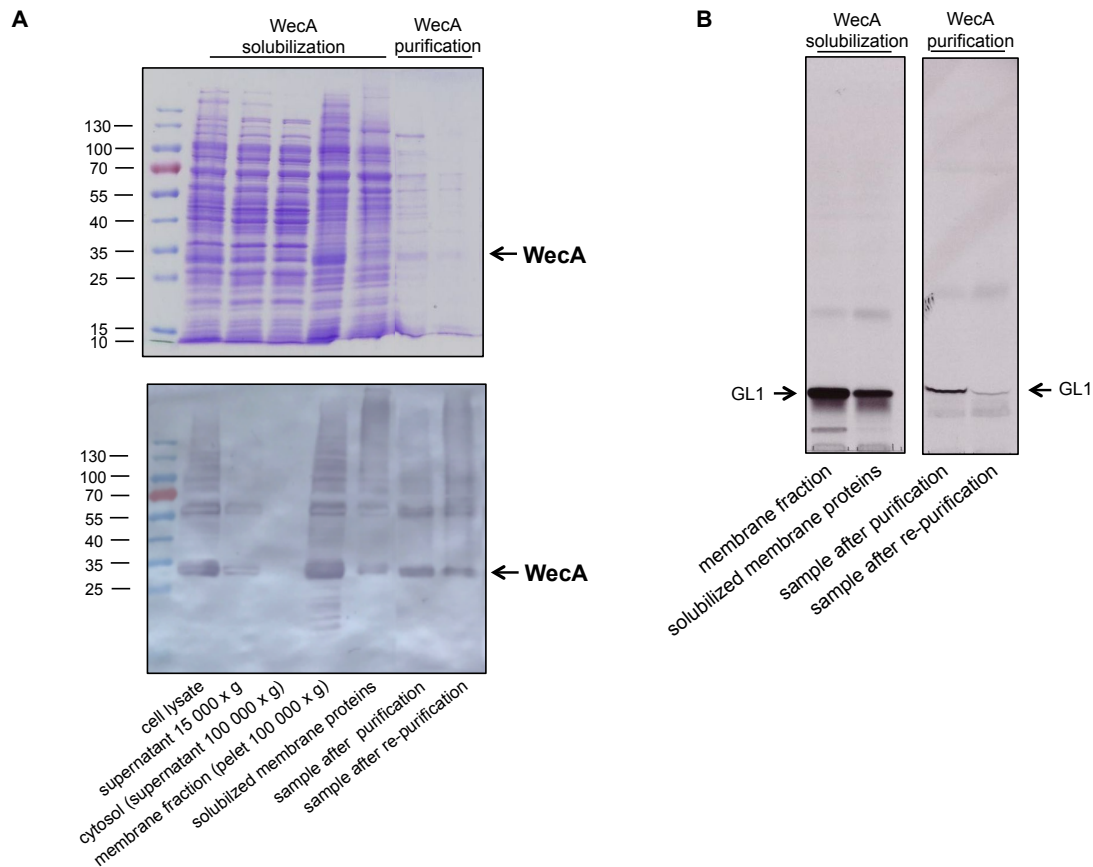

**Figure S3. Solubilization, purification and activity of WecA from *M. thermoresistibile*.**

**A.** HisTagged recombinant WecA from *M. thermoresistibile* was solubilized with CHAPS detergent (136 mM) from membrane fraction isolated from overproducing strain *E. coli* C43(DE3)/pET28a-wecA<sub>Mth</sub>. Purification was performed in two steps using TALON Co<sup>2+</sup> resin. Samples after solubilization and purification were analyzed by SDS-PAGE (upper panel) and Western blot (bottom panel).

**B.** Autoradiogram of TLC analysis of WecA reaction products. Reaction mixture contained 50 mM TRIS HCl pH 8.0, 40 mM MgCl<sub>2</sub>, 50 mM sucrose, 10% glycerol, 5 mM β-mercaptoethanol, 0.5% CHAPS, 50 μM decaprenyl phosphate and 0.25 μCi of UDP-[<sup>14</sup>C]-GlcNAc in total volume 80 μl. Reactions were initiated by addition of crude membrane fraction (200 μg of proteins) or solubilized membrane proteins (200 μg of proteins) or sample after purification (20 μg of proteins) or sample after re-purification (20 μg of proteins), respectively from *E. coli* C43(DE3)/pET28a-wecA<sub>Mth</sub> strain. Reactions were incubated 1 hour at 37 °C. [<sup>14</sup>C]-labeled glycolipid 1 (GL1) was extracted by Folch wash as described in Materials and Methods and the extraction procedure was repeated one more time. Organic phase was finally dried under nitrogen stream and dissolved in 50 μl of CHCl<sub>3</sub>/CH<sub>3</sub>OH/conc. NH<sub>4</sub>OH/H<sub>2</sub>O (65:25:0.5:3.6). 20% of the organic phase was measured by scintillation counting and 40% was loaded on Silica-gel TLC plate followed by developing in CHCl<sub>3</sub>/CH<sub>3</sub>OH/conc. NH<sub>4</sub>OH/H<sub>2</sub>O (65:25:0.5:3.6). TLC plate was exposed on autoradiography film for 36 days.



|                               |   |    |    |    |    |    |    |    |   |   |   |   |   |   |   |   |   |   |   |   |   |   |   |   |   |   |   |   |   |   |   |   |   |   |   |   |   |   |   |   |   |   |   |   |   |   |   |   |   |   |   |   |   |   |   |   |   |   |   |   |   |   |   |   |   |   |   |
|-------------------------------|---|----|----|----|----|----|----|----|---|---|---|---|---|---|---|---|---|---|---|---|---|---|---|---|---|---|---|---|---|---|---|---|---|---|---|---|---|---|---|---|---|---|---|---|---|---|---|---|---|---|---|---|---|---|---|---|---|---|---|---|---|---|---|---|---|---|---|
|                               | 1 | 10 | 20 | 30 | 40 | 50 | 60 | 70 |   |   |   |   |   |   |   |   |   |   |   |   |   |   |   |   |   |   |   |   |   |   |   |   |   |   |   |   |   |   |   |   |   |   |   |   |   |   |   |   |   |   |   |   |   |   |   |   |   |   |   |   |   |   |   |   |   |   |   |
| 1. MraY M. smegmatis mc2155   | M | N  | L  | I  | L  | A  | V  | S  | I | L | L | P | A | L | R | L | F | K | Q | G | L | G | H | R | E | D | G | P | S | H | A | K | K | R | G | T | P | S | M | G | G | V | A | L | A | G | W | A | G | V | L | G | S | H | I | V | G | M | A | M | G |   |   |   |   |   |   |
| 2. MurX M. tuberculosis H37Ra | D | R  | Q  | I  | L  | A  | V  | A  | V | A | V | I | V | S | I | L | L | P | V | I | R | L | F | K | Q | G | L | G | H | R | E | D | G | P | S | H | H | T | K | R | G | T | P | S | M | G | G | V | A | L | A | G | W | A | G | V | L | G | S | H | I | V | G | M | A | M | G |
| 3. MurX M. tuberculosis H37Rv | M | R  | Q  | I  | L  | A  | V  | A  | V | A | V | I | V | S | I | L | L | P | V | I | R | L | F | K | Q | G | L | G | H | R | E | D | G | P | S | H | H | T | K | R | G | T | P | S | M | G | G | V | A | L | A | G | W | A | G | V | L | G | S | H | I | V | G | M | A | M | G |

  

|                               |    |    |     |     |     |     |     |     |   |   |   |   |   |   |   |   |   |   |   |   |   |   |   |   |   |   |   |   |   |   |   |   |   |   |   |   |   |   |   |   |   |   |   |   |   |   |   |   |   |   |   |   |   |   |   |   |   |   |   |   |   |   |   |   |   |   |   |   |   |   |   |   |   |   |   |   |
|-------------------------------|----|----|-----|-----|-----|-----|-----|-----|---|---|---|---|---|---|---|---|---|---|---|---|---|---|---|---|---|---|---|---|---|---|---|---|---|---|---|---|---|---|---|---|---|---|---|---|---|---|---|---|---|---|---|---|---|---|---|---|---|---|---|---|---|---|---|---|---|---|---|---|---|---|---|---|---|---|---|---|
|                               | 80 | 90 | 100 | 110 | 120 | 130 | 140 | 150 |   |   |   |   |   |   |   |   |   |   |   |   |   |   |   |   |   |   |   |   |   |   |   |   |   |   |   |   |   |   |   |   |   |   |   |   |   |   |   |   |   |   |   |   |   |   |   |   |   |   |   |   |   |   |   |   |   |   |   |   |   |   |   |   |   |   |   |   |
| 1. MraY M. smegmatis mc2155   | D  | G  | P   | S   | A   | S   | G   | L   | L | V | L | G | L | A | T | V | L | G | G | V | G | F | I | D | D | M | K | L | K | R | A | R | N | L | G | L | N | K | T | A | K | T | V | G | G | L | F | A | A | V | L | F | G | V | L | A | L | O | F | R | N | G | D | G | L | T | P | G | S | A | E | L | S | Y | V | R |
| 2. MurX M. tuberculosis H37Ra | E  | G  | I   | G   | A   | S   | G   | L   | L | V | L | G | L | A | T | A | L | G | G | V | G | F | I | D | D | K | I | R | R | S | R | N | L | G | L | N | K | T | A | K | T | V | G | G | L | F | A | A | V | L | F | G | V | L | A | L | O | F | R | N | A | A | G | L | T | P | G | S | A | E | L | S | Y | V | R |   |
| 3. MurX M. tuberculosis H37Rv | E  | G  | I   | G   | A   | S   | G   | L   | L | V | L | G | L | A | T | A | L | G | G | V | G | F | I | D | D | K | I | R | R | S | R | N | L | G | L | N | K | T | A | K | T | V | G | G | L | F | A | A | V | L | F | G | V | L | A | L | O | F | R | N | A | A | G | L | T | P | G | S | A | E | L | S | Y | V | R |   |

  

|                               |     |     |     |     |     |     |     |     |     |   |   |   |   |   |   |   |   |   |   |   |   |   |   |   |   |   |   |   |   |   |   |   |   |   |   |   |   |   |   |   |   |   |   |   |   |   |   |   |   |   |   |   |   |   |   |   |   |   |   |   |   |   |   |   |   |   |   |   |   |   |   |   |   |   |   |   |
|-------------------------------|-----|-----|-----|-----|-----|-----|-----|-----|-----|---|---|---|---|---|---|---|---|---|---|---|---|---|---|---|---|---|---|---|---|---|---|---|---|---|---|---|---|---|---|---|---|---|---|---|---|---|---|---|---|---|---|---|---|---|---|---|---|---|---|---|---|---|---|---|---|---|---|---|---|---|---|---|---|---|---|---|
|                               | 150 | 160 | 170 | 180 | 190 | 200 | 210 | 220 | 230 |   |   |   |   |   |   |   |   |   |   |   |   |   |   |   |   |   |   |   |   |   |   |   |   |   |   |   |   |   |   |   |   |   |   |   |   |   |   |   |   |   |   |   |   |   |   |   |   |   |   |   |   |   |   |   |   |   |   |   |   |   |   |   |   |   |   |   |
| 1. MraY M. smegmatis mc2155   | E   | L   | A   | T   | V   | L   | L   | A   | P   | A | L | F | V | L | F | C | V | V | I | V | S | A | W | S | N | A | V | N | F | I | D | G | L | D | G | L | A | A | G | T | M | A | M | V | F | A | A | Y | V | L | T | F | W | O | Y | R | N | A | C | V | F | A | P | G | L | G | C | Y | N | V | R | D | P | L | D | I |
| 2. MurX M. tuberculosis H37Ra | E   | L   | A   | T   | V   | L   | L   | A   | P   | V | L | F | V | L | F | C | V | V | I | V | S | A | W | S | N | A | V | N | F | I | D | G | L | D | G | L | A | A | G | T | M | A | M | V | F | A | A | Y | V | L | T | F | W | O | Y | R | N | A | C | V | F | A | P | G | L | G | C | Y | N | V | R | D | P | L | D | I |
| 3. MurX M. tuberculosis H37Rv | E   | L   | A   | T   | V   | L   | L   | A   | P   | V | L | F | V | L | F | C | V | V | I | V | S | A | W | S | N | A | V | N | F | I | D | G | L | D | G | L | A | A | G | T | M | A | M | V | F | A | A | Y | V | L | T | F | W | O | Y | R | N | A | C | V | F | A | P | G | L | G | C | Y | N | V | R | D | P | L | D | I |

  

|                               |     |     |     |     |     |     |     |   |   |   |   |   |   |   |   |   |   |   |   |   |   |   |   |   |   |   |   |   |   |   |   |   |   |   |   |   |   |   |   |   |   |   |   |   |   |   |   |   |   |   |   |   |   |   |   |   |   |   |   |   |   |   |   |   |   |   |   |   |   |   |   |
|-------------------------------|-----|-----|-----|-----|-----|-----|-----|---|---|---|---|---|---|---|---|---|---|---|---|---|---|---|---|---|---|---|---|---|---|---|---|---|---|---|---|---|---|---|---|---|---|---|---|---|---|---|---|---|---|---|---|---|---|---|---|---|---|---|---|---|---|---|---|---|---|---|---|---|---|---|---|
|                               | 240 | 250 | 260 | 270 | 280 | 290 | 300 |   |   |   |   |   |   |   |   |   |   |   |   |   |   |   |   |   |   |   |   |   |   |   |   |   |   |   |   |   |   |   |   |   |   |   |   |   |   |   |   |   |   |   |   |   |   |   |   |   |   |   |   |   |   |   |   |   |   |   |   |   |   |   |   |
| 1. MraY M. smegmatis mc2155   | A   | L   | V   | A   | A   | T   | A   | G | A | C | V | G | F | L | W | W | N | A | A | P | A | K | I | F | M | G | D | T | G | S | L | A | L | G | G | I | A | G | S | V | T | S | R | T | E | L | A | V | V | I | G | A | F | V | A | E | V | T | S | V | V | O | L | I | A | F | R | T | T | G | R |
| 2. MurX M. tuberculosis H37Ra | A   | L   | V   | A   | A   | T   | A   | G | A | C | V | G | F | L | W | W | N | A | A | P | A | K | I | F | M | G | D | T | G | S | L | A | L | G | G | I | A | G | S | V | T | S | R | T | E | L | A | V | V | I | G | A | F | V | A | E | V | T | S | V | V | O | L | I | A | F | R | T | T | G | R |
| 3. MurX M. tuberculosis H37Rv | A   | L   | V   | A   | A   | T   | A   | G | A | C | V | G | F | L | W | W | N | A | A | P | A | K | I | F | M | G | D | T | G | S | L | A | L | G | G | I | A | G | S | V | T | S | R | T | E | L | A | V | V | I | G | A | F | V | A | E | V | T | S | V | V | O | L | I | A | F | R | T | T | G | R |

  

|                               |     |     |     |     |     |     |   |   |   |   |   |   |   |   |   |   |   |   |   |   |   |   |   |   |   |   |   |   |   |   |   |   |   |   |   |   |   |   |   |   |   |   |   |   |   |   |   |
|-------------------------------|-----|-----|-----|-----|-----|-----|---|---|---|---|---|---|---|---|---|---|---|---|---|---|---|---|---|---|---|---|---|---|---|---|---|---|---|---|---|---|---|---|---|---|---|---|---|---|---|---|---|
|                               | 310 | 320 | 330 | 340 | 350 | 355 |   |   |   |   |   |   |   |   |   |   |   |   |   |   |   |   |   |   |   |   |   |   |   |   |   |   |   |   |   |   |   |   |   |   |   |   |   |   |   |   |   |
| 1. MraY M. smegmatis mc2155   | R   | V   | F   | R   | M   | A   | P | F | H | H | H | F | L | V | G | W | A | E | T | T | V | I | R | F | W | L | T | A | I | T | C | G | L | G | V | A | L | F | Y | G | E | W | I | A | V | G | A |
| 2. MurX M. tuberculosis H37Ra | R   | M   | F   | R   | M   | A   | P | F | H | H | H | F | L | V | G | W | A | E | T | T | V | I | R | F | W | L | T | A | I | T | C | G | L | G | V | A | L | F | Y | G | E | W | I | A | V | G | A |
| 3. MurX M. tuberculosis H37Rv | R   | M   | F   | R   | M   | A   | P | F | H | H | H | F | L | V | G | W | A | E | T | T | V | I | R | F | W | L | T | A | I | T | C | G | L | G | V | A | L | F | Y | G | E | W | I | A | V | G | A |

**Figure S4. Protein identity of mycobacterial translocase I orthologs.** Protein identity was compared by Geneious software (Geneious version 7.1 created by Biomatters. Available from <http://www.geneious.com>)

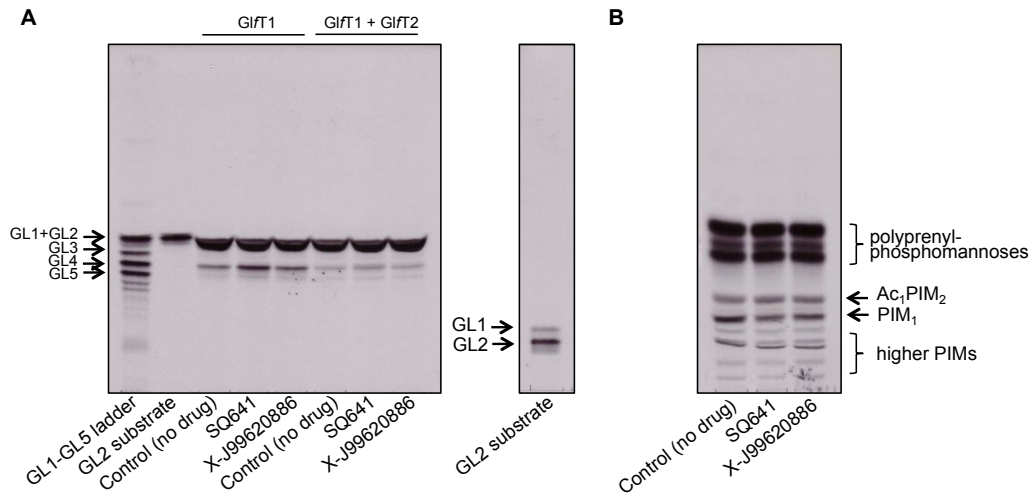

**Figure S5. Effects of SQ641 and X-J99620886 on mycobacterial galactofuranosyltransferases and mannosyltransferases.**

**A.** An autoradiogram of TLC analysis monitoring polymerization of mycobacterial galactan using glycolipid 2 ( $[^{14}\text{C}]$ -GL2 as a radiolabeled substrate. **B.** An autoradiogram of TLC analysis monitoring mannosyltransferase activity using GDP- $[^{14}\text{C}]$ Man as a substrate.  $[^{14}\text{C}]$ -GL2 was prepared as described (2), and analyzed by TLC (A, right panel). All assays were performed in 50 mM MOPS pH 7.9, 10 mM  $\text{MgCl}_2$ , 5 mM  $\beta$ -mercaptoethanol in total volume 80  $\mu\text{l}$ . SQ641 and X-J99620886 were tested in 200  $\mu\text{M}$  final concentrations. The final concentration of DMSO in assays was 2% (v/v). Reaction mixtures containing  $[^{14}\text{C}]$ GL2 (2 000 dpm) were supplemented with crude GlfT1 and GlfT2 extracts (15,000 x g supernatant of lysate, 200  $\mu\text{g}$  of protein) from *E. coli* BL21(DE3)/pET28a-*msmeg\_6367* (*glfT1*) and *E. coli* C41(DE3)/pET15b-*rv3808c* (*glfT2*) as described (3). Reaction mixtures containing GDP- $[^{14}\text{C}]$ Man (0.25  $\mu\text{Ci}$ ; specific activity 305 mCi/mmol, ARC) contained membrane fraction (300  $\mu\text{g}$  protein) isolated from *M. smegmatis* mc<sup>2</sup>155 as described (4). 10% of the organic phase after Folch wash extraction was loaded on Silica-gel TLC plate followed by developing in  $\text{CHCl}_3/\text{CH}_3\text{OH}/\text{conc. NH}_4\text{OH}/1 \text{ M CH}_3\text{COONH}_4/\text{H}_2\text{O}$  (65:25:0.5:3.6) (A) or  $\text{CHCl}_3/\text{CH}_3\text{OH}/\text{conc. NH}_4\text{OH}/\text{H}_2\text{O}$  (65:25:0.5:4) (B). TLC plate was exposed on autoradiography film for 19 days (A) or 2 days (B).

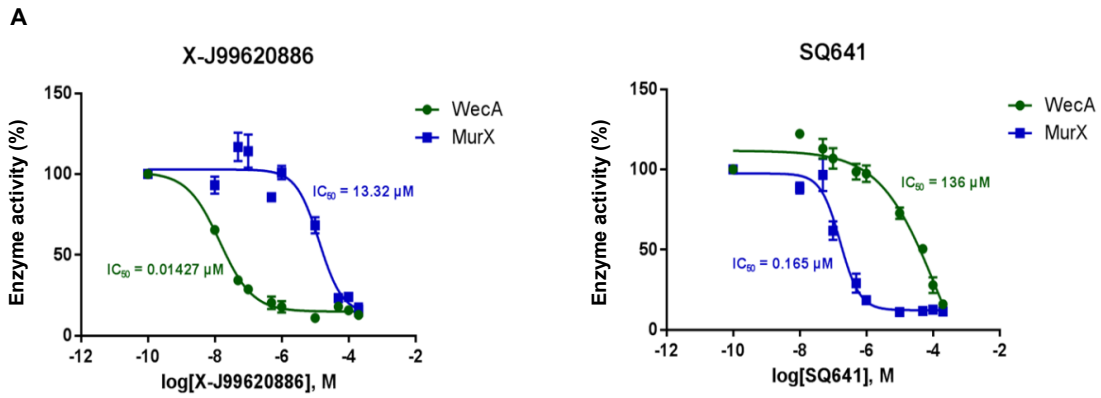

|      | IC <sub>50</sub> (μM) |             |
|------|-----------------------|-------------|
|      | SQ641                 | X-J99620886 |
| WecA | 136.00                | 0.0143      |
| MurX | 0.1650                | 13.320      |

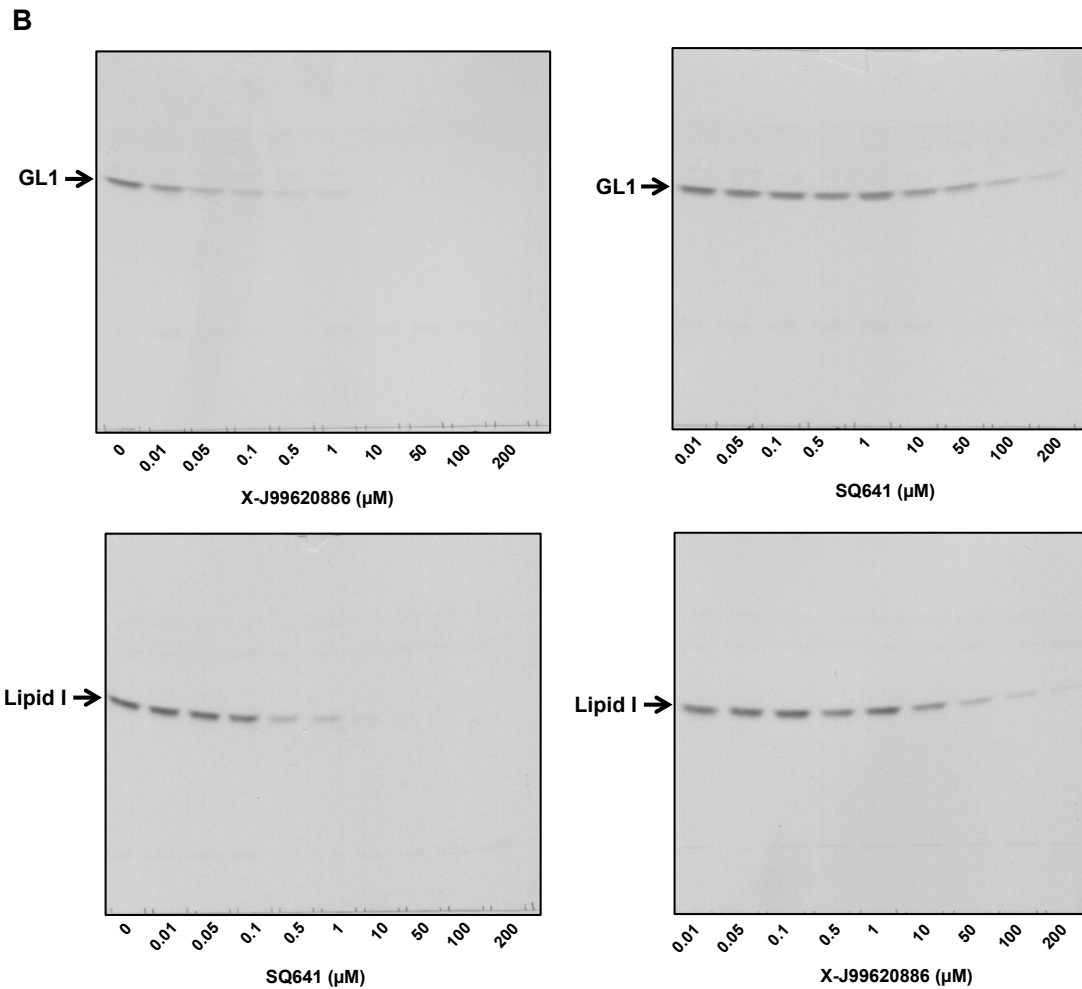

**Figure S6. Determination of IC<sub>50</sub> values for SQ641 and X-J99620886.** Selectivity of SQ641 and X-J99620886 towards WecA and MurX of *M. tuberculosis* H37Ra was investigated by dose-dependent inhibition study using radiometric assays. Nonlinear regression analysis was used to calculate IC<sub>50</sub> values by GraphPad Prism 6 software. **A.** Log dose vs. response curves with IC<sub>50</sub> values. **B.** Products of the reaction mixtures (GL1 or lipid I) after visualization by autoradiography.

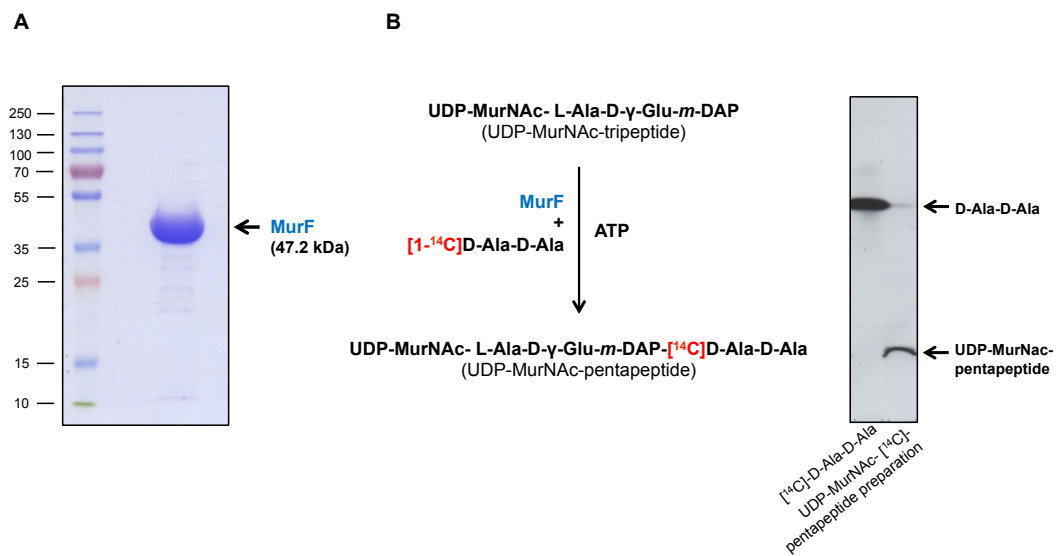

**Figure S7. Enzymatic synthesis of UDP-MurNac-[<sup>14</sup>C]-pentapeptide (Park's nucleotide).** [<sup>14</sup>C]-labeled UDP-MurNac-pentapeptide was enzymatically synthesized with purified MurF protein using UDP-MurNac-tripeptide and [<sup>14</sup>C]-D-Ala-D-Ala. **A.** Purified MurF protein analyzed by SDS-PAGE. **B.** Enzymatic reaction catalyzed by MurF protein and prepared UDP-MurNac[<sup>14</sup>C]-pentapeptide analyzed by TLC followed by autoradiography. Silica-gel TLC plate was developed in 2-propanol/conc. NH<sub>4</sub>OH/H<sub>2</sub>O (6:3:1) and exposed on autoradiography film for 4 days.

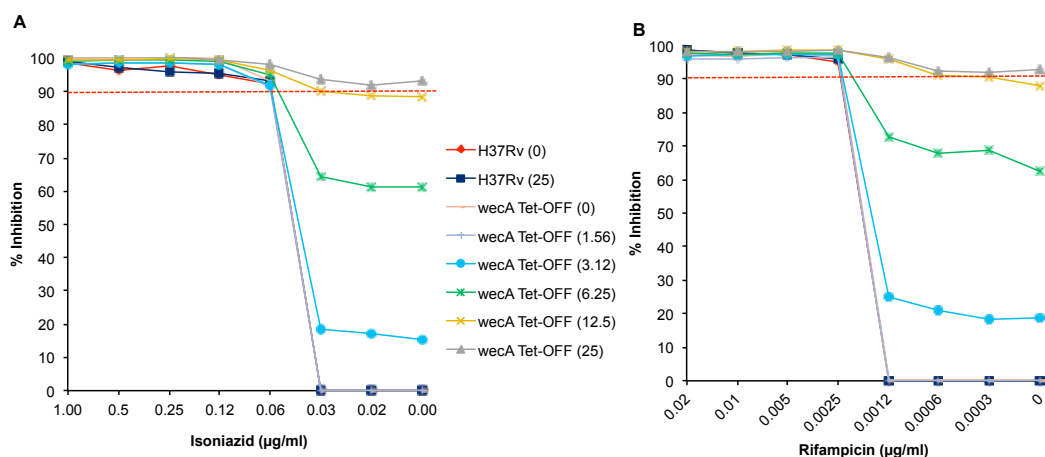

**Figure S8. Silencing of *wecA* in *Mtb* showed no effect on sensitivity to Isoniazid and Rifampicin.** A two dimensional array of serial dilutions of ATc and Isoniazid and Rifampicin were added to the cultures for determining the susceptibility of H37Rv and *wecA* Tet-OFF strains. Bacterial viability was assessed by the Alamar Blue assay as described in Methods.

#### References:

1. Singh V, Donini S, Pacitto A, Sala C, Hartkoorn RC, Dhar N, Keri G, Ascher DB, Mondesert G, Vocat A, Lupien A, Sommer R, Vermet H, Lagrange S, Buechler J, Warner DF, McKinney JD, Pato J, Cole ST, Blundell TL, Rizzi M, Mizrahi V. 2017. The Inosine Monophosphate Dehydrogenase, GuaB2, Is a Vulnerable New Bactericidal Drug Target for Tuberculosis. *ACS Infect Dis* **3**:5-17.
2. Mikusova K, Mikus M, Besra GS, Hancock I, Brennan PJ. 1996. Biosynthesis of the linkage region of the mycobacterial cell wall. *J Biol Chem* **271**:7820-7828.
3. Belanova M, Dianiskova P, Brennan PJ, Completo GC, Rose NL, Lowary TL, Mikusova K. 2008. Galactosyl transferases in mycobacterial cell wall synthesis. *J Bacteriol* **190**:1141-1145.
4. Kordulakova J, Gilleron M, Mikusova K, Puzo G, Brennan PJ, Gicquel B, Jackson M. 2002. Definition of the first mannosylation step in phosphatidylinositol mannoside synthesis. PimA is essential for growth of mycobacteria. *J Biol Chem* **277**:31335-31344.
